# Supplementary material for: Magnetic-field-assisted synthesis of anisotropic iron oxide particles: Effect of pH
Source: publisher site journal article supplement (doi:10.3762/bjnano.11.107), 2020-08-17
Supplement: Additional file 1 [file 2190-4286-11-107-S1.pdf]

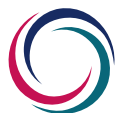

## Supporting Information

for

### **Magnetic-field-assisted synthesis of anisotropic iron oxide particles: Effect of pH**

Andrey V. Shibaev, Petr V. Shvets, Darya E. Kessel, Roman A. Kamyshinsky, Anton S. Orekhov, Sergey S. Abramchuk, Alexei R. Khokhlov and Olga E. Philippova

*Beilstein J. Nanotechnol.* **2020**, *11*, 1230–1241. [doi:10.3762/bjnano.11.107](https://doi.org/10.3762/bjnano.11.107)

### **EDX spectrum, TEM micrographs, histogram of nanoparticle diameters, and scheme of the experimental setup**

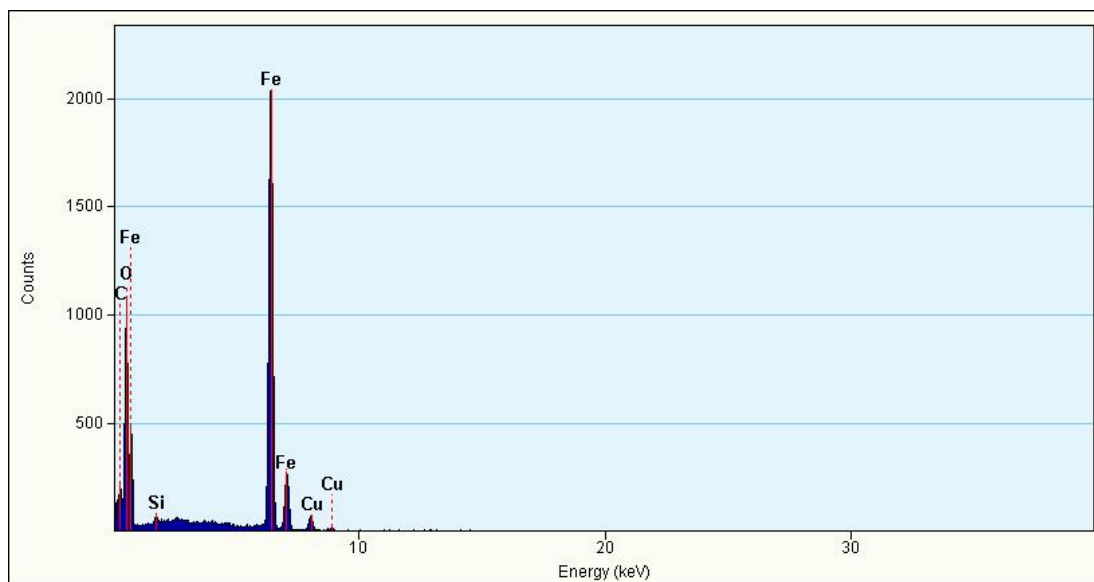

**Figure S1:** Energy-dispersive X-ray (EDX) spectrum for the sample synthesized at 1.3 M NaOH ( $R = 2.1$ ) under magnetic field of 0.4 T at 20 °C.

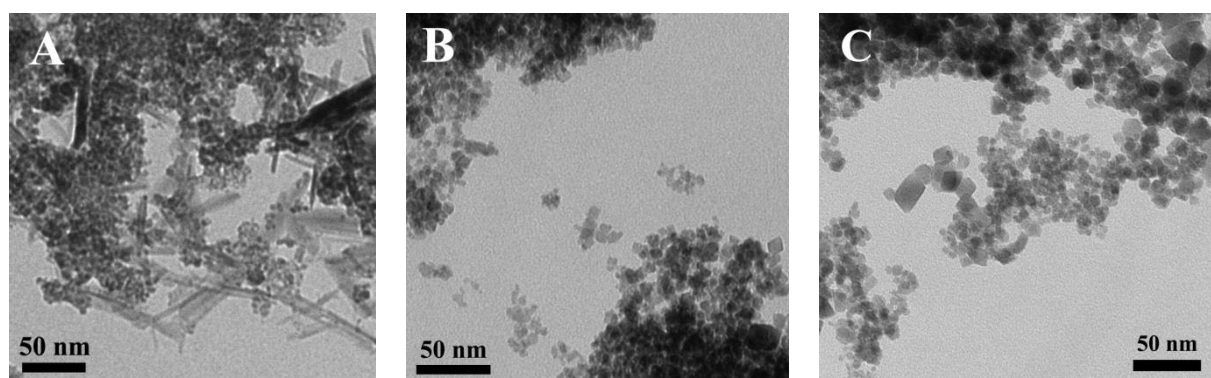

**Figure S2:** TEM micrographs of nanostructures synthesized at different molar ratios  $R$  of  $\text{OH}^-$  ions to the total amount of iron ( $\text{Fe}^{3+}$  and  $\text{Fe}^{2+}$ ) ions in the mixture: 2.4 (A), 2.8 (B), 3.3 (C) under magnetic field of 0.4 T at 20 °C. pH of the samples after synthesis: 6.3 (A), 9 (B), 12 (C).

**Table S1:** Content of different atoms calculated from the EDX spectrum.

| Atom | Weight % | Atomic % |
|------|----------|----------|
| O    | 23.7     | 44.8     |
| Fe   | 65.8     | 35.6     |
| C    | 6.9      | 17.5     |
| Cu   | 2.8      | 1.3      |
| Si   | 0.7      | 0.7      |

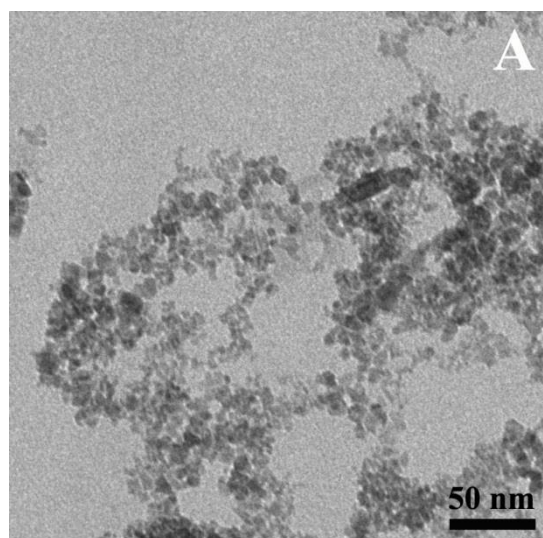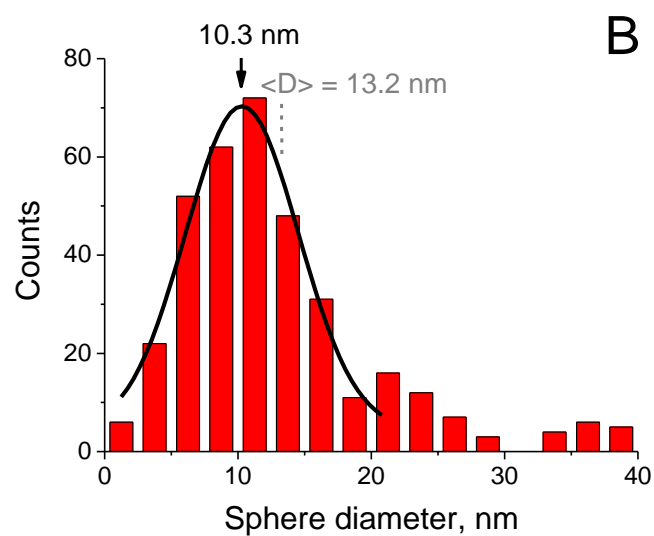

**Figure S3:** TEM micrograph (A) and histogram of nanoparticles diameters (B) for the sample synthesized at 5 M NaOH ( $R = 8$ ) in the absence of magnetic field at 20 °C.

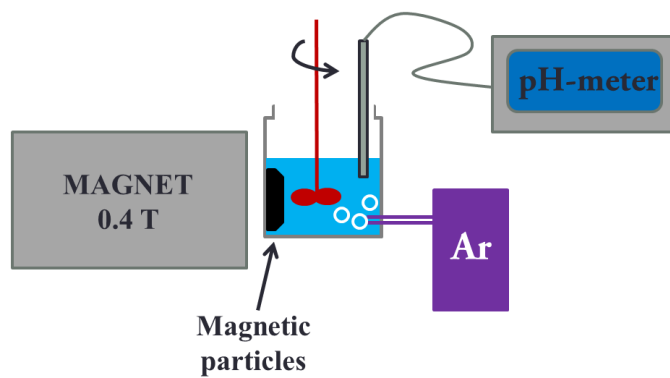

**Figure S4:** Experimental setup used for the synthesis of magnetite nanorods.
